# Supplementary material for: Diffusion coefficients of organic molecules in sucrose-water solutions and comparison with Stokes–Einstein predictions
Source: Copernicus journal article supplement (doi:10.5194/acp-2016-740), 2016-08-24
Supplement: Supplementary file 1 [file acp-2016-740-supplement.pdf]

## Supplement

### S.1. Equilibration times with the surrounding RH

As mentioned in the main text, when preparing thin films with sucrose concentrations  $> 67$  wt % sucrose (which corresponds to solutions supersaturated with respect to crystalline sucrose) first a droplet containing 60 wt % sucrose in water and trace amounts of dye was placed on a siliconized hydrophobic slide (Hampton Research) using a micropipette. Next, the hydrophobic slide containing the droplet was placed into a flow cell or sealed glass container with a set RH. The slide containing the droplet was left inside the flow cell or container and given enough time to come to equilibrium with the surrounding RH. To determine the time required to come to equilibrium we first calculated the characteristic time for mixing of water by molecular diffusion within a droplet ( $\tau_{diff,water}$ ) using the following equation (Seinfeld and Pandis, 2006; Shiraiwa et al., 2011):

$$\tau_{diff,water} = \frac{R_{droplet}^2}{\pi^2 D_{H2O}} \quad (S1)$$

Where  $R_{droplet}$  is the radius of the droplet and  $D_{H2O}$  is the diffusion coefficient of water molecules in a sucrose-water solution. Equation S1 corresponds to the time at which the concentration of water at centre of the droplet deviates by less than  $1/e$  from anywhere else in the droplet. To ensure that enough time was allowed for the surrounding RH to come to equilibrium with the droplets in our experiment, the time the droplets were exposed to a give RH ( $t_{exp}$ ) was at least a factor of 2.5 greater than  $\tau_{diff,water}$ . In some experiments we also varied  $t_{exp}$  from a factor of approximately 2.5 to 5.5 greater than  $\tau_{diff,water}$ , and in these experiments we did not see a systematic decrease in the measured diffusion coefficients of the organic dyes, suggesting that using  $t_{exp}$  values of 2.5 greater than  $\tau_{diff,water}$  was sufficient to equilibrate the droplets with surrounding gas phase water vapor. In (Tables S1-S3)  $\tau_{diff,water}$  and  $t_{exp}$  used in each experiment is given. When calculating  $\tau_{diff,water}$  we used diffusion coefficients of water in sucrose-water solutions reported by Price et al. (2014).

### S.2 Fluorescence signal as a function of dye concentration in sucrose-water films

In a separate set of experiments, we measured the fluorescence signal as a function of the dye concentration in sucrose-water films. Thin films (50 wt % sucrose in water) were prepared as describe in the main text with a range of dye concentrations (see Figures S1-S3).

For the measurements with fluorescein and calcein, we used a Leica TCS SP5 II confocal laser scanning microscope with a 10x 0.4 NA objective, a pinhole of 53.07  $\mu\text{m}$  and an Ar 488 nm laser. Fluorescence intensity was measured over an area of 140  $\mu\text{m}$  x 140  $\mu\text{m}$ . For the measurements with rhodamine 6G, we used a Zeiss Axio LSM 5 MP laser scanning microscope with a 10x 0.3 NA objective, a pinhole of 80  $\mu\text{m}$ , and a 543 nm HeNe laser. Fluorescence intensity was measured over an area of 200  $\mu\text{m}$  x 200  $\mu\text{m}$ . Average fluorescence intensity per pixel was recorded and plotted in Figures S1-S3.

## Tables

**Table S.1.** Selected parameters used in fluorescein FRAP experiments and resulting diffusion coefficients.

| $a_w$ | Thin film # | Droplet radius ( $\mu\text{m}$ ) | $\tau_{\text{diff,water}}$ | $t_{\text{exp}}$ | Photobleach size ( $\mu\text{m} \times \mu\text{m}$ ) | Measured diffusion coefficients of organic dye ( $\mu\text{m}^2/\text{s}$ ) |
|-------|-------------|----------------------------------|----------------------------|------------------|-------------------------------------------------------|-----------------------------------------------------------------------------|
| 0.88  | 1           | 350                              | N/A <sup>a</sup>           | N/A <sup>a</sup> | 30 x 30                                               | 6.46                                                                        |
|       | 2           | 350                              | N/A <sup>a</sup>           | N/A <sup>a</sup> | 30 x 30                                               | 6.73                                                                        |
|       | 3           | 350                              | N/A <sup>a</sup>           | N/A <sup>a</sup> | 30 x 30                                               | 7.94                                                                        |
| 0.80  | 1           | 350                              | 11 min                     | 30 min           | 30 x 30                                               | 2.10                                                                        |
|       | 2           | 350                              | 11 min                     | 1 hrs            | 30 x 30                                               | 0.94                                                                        |
|       | 3           | 350                              | 11 min                     | 1.5 hrs          | 30 x 30                                               | 1.69                                                                        |
| 0.70  | 1           | 350                              | 55 min                     | 2.5 hrs          | 15 x 15                                               | 0.0618                                                                      |
|       | 2           | 350                              | 55 min                     | 3.75 hrs         | 15 x 15                                               | 0.110                                                                       |
|       | 3           | 350                              | 55 min                     | 5 hrs            | 15 x 15                                               | 0.111                                                                       |
| 0.60  | 1           | 350                              | 5.2 hrs                    | 14 hrs           | 5 x 5                                                 | 0.00358                                                                     |
|       | 2           | 350                              | 5.2 hrs                    | 21 hrs           | 5 x 5                                                 | 0.00425                                                                     |
|       | 3           | 350                              | 5.2 hrs                    | 28 hrs           | 5 x 5                                                 | 0.00384                                                                     |
| 0.52  | 1           | 350                              | 1.5 days                   | 4 days           | 5 x 5                                                 | 0.000145                                                                    |
|       | 2           | 350                              | 1.5 days                   | 6 days           | 5 x 5                                                 | 0.000324                                                                    |
|       | 3           | 350                              | 1.5 days                   | 8 days           | 5 x 5                                                 | 0.000391                                                                    |
| 0.38  | 1           | 150                              | 2.6 days                   | 10 days          | 5 x 5                                                 | 2.23E-5                                                                     |
|       | 2           | 150                              | 2.6 days                   | 10 days          | 5 x 5                                                 | 5.45E-6                                                                     |
|       | 3           | 150                              | 2.6 days                   | 10 days          | 5 x 5                                                 | 9.00E-6                                                                     |

<sup>a</sup> Droplets with an  $a_w$  0.88 were prepared gravimetrically, and hence  $\tau_{\text{diff,water}}$  and  $t_{\text{exp}}$  are not applicable (N/A) in this case.

**Table S.2.** Selected parameters used in rhodamine 6G FRAP experiments and resulting diffusion coefficients.

| $a_w$ | Thin film # | Droplet radius ( $\mu\text{m}$ ) | $\tau_{\text{diff,water}}$ | $t_{\text{exp}}$ | Photobleach size ( $\mu\text{m} \times \mu\text{m}$ ) | Measured diffusion coefficients of organic dye ( $\mu\text{m}^2/\text{s}$ ) |
|-------|-------------|----------------------------------|----------------------------|------------------|-------------------------------------------------------|-----------------------------------------------------------------------------|
|       | 1           | 350                              | N/A <sup>a</sup>           | N/A <sup>a</sup> | 36 x 36                                               | 34.67                                                                       |
|       | 2           | 350                              | N/A <sup>a</sup>           | N/A <sup>a</sup> | 36 x 36                                               | 16.53                                                                       |
|       | 3           | 350                              | N/A <sup>a</sup>           | N/A <sup>a</sup> | 36 x 36                                               | 43.66                                                                       |
| 0.85  | 1           | 350                              | N/A <sup>a</sup>           | N/A <sup>a</sup> | 36 x 36                                               | 1.53                                                                        |
|       | 2           | 350                              | N/A <sup>a</sup>           | N/A <sup>a</sup> | 36 x 36                                               | 1.30                                                                        |
|       | 3           | 350                              | N/A <sup>a</sup>           | N/A <sup>a</sup> | 36 x 36                                               | 1.04                                                                        |
| 0.80  | 1           | 350                              | 11 min                     | 1 h              | 36 x 36                                               | 0.545                                                                       |
|       | 2           | 350                              | 11 min                     | 1 h              | 36 x 36                                               | 0.607                                                                       |
|       | 3           | 350                              | 11 min                     | 1 h              | 36 x 36                                               | 0.418                                                                       |
| 0.75  | 1           | 350                              | 17 min                     | 1 h              | 36 x 36                                               | 0.0586                                                                      |
|       | 2           | 350                              | 17 min                     | 1 h              | 36 x 36                                               | 0.0841                                                                      |
|       | 3           | 350                              | 17 min                     | 2 hrs            | 36 x 36                                               | 0.0794                                                                      |
| 0.60  | 1           | 140                              | 0.85 hrs                   | 3 hrs            | 10 x 10                                               | 0.00187                                                                     |
|       | 2           | 125                              | 0.67 hrs                   | 3 hrs            | 10 x 10                                               | 0.00567                                                                     |
|       | 3           | 90                               | 0.35 hrs                   | 3 hrs            | 10 x 10                                               | 0.00266                                                                     |
| 0.52  | 1           | 190                              | 11 hrs                     | 6 d 15 hrs       | 5 x 5                                                 | 0.000286                                                                    |
|       | 2           | 150                              | 7 hrs                      | 6 d 15 hrs       | 5 x 5                                                 | 0.000204                                                                    |
|       | 3           | 200                              | 12 hrs                     | 6 d 15 hrs       | 5 x 5                                                 | 0.000143                                                                    |
| 0.38  | 1           | 75                               | 1 d                        | 6 d              | 5 x 5                                                 | 2.52E-06                                                                    |
|       | 2           | 60                               | 17 hrs                     | 12 d             | 5 x 5                                                 | 2.25E-06                                                                    |
|       | 3           | 100                              | 2 d                        | 93 d             | 5 x 5                                                 | 7.11E-07                                                                    |
|       | 4           | 75                               | 1 d                        | 93 d             | 5 x 5                                                 | 7.55E-07                                                                    |

<sup>a</sup> Droplets with an  $a_w$  of 0.93 and 0.85 were prepared gravimetrically, and hence  $\tau_{\text{diff,water}}$  and  $t_{\text{exp}}$  are not applicable (N/A) in these cases.

**Table S.3.** Selected parameters used in calcein FRAP experiments and resulting diffusion coefficients.

| $a_w$ | Thin film # | Droplet radius ( $\mu\text{m}$ ) | $\tau_{\text{diff,water}}$ | $t_{\text{exp}}$ | Photobleach size ( $\mu\text{m} \times \mu\text{m}$ ) | Measured diffusion coefficients of organic dye ( $\mu\text{m}^2/\text{s}$ ) |
|-------|-------------|----------------------------------|----------------------------|------------------|-------------------------------------------------------|-----------------------------------------------------------------------------|
| 0.88  | 1           | 350                              | N/A <sup>a</sup>           | N/A <sup>a</sup> | 30 x 30                                               | 4.32                                                                        |
|       | 2           | 350                              | N/A <sup>a</sup>           | N/A <sup>a</sup> | 30 x 30                                               | 3.95                                                                        |
|       | 3           | 350                              | N/A <sup>a</sup>           | N/A <sup>a</sup> | 30 x 30                                               | 3.27                                                                        |
| 0.80  | 1           | 350                              | 11 min                     | 30 min           | 15 x 15                                               | 0.158                                                                       |
|       | 2           | 350                              | 11 min                     | 1 hrs            | 15 x 15                                               | 0.440                                                                       |
|       | 3           | 350                              | 11 min                     | 1.5 hrs          | 15 x 15                                               | 0.229                                                                       |
| 0.70  | 1           | 350                              | 34 min                     | 2.5 hrs          | 5 x 5                                                 | 0.0209                                                                      |
|       | 2           | 350                              | 34 min                     | 3.75 hrs         | 5 x 5                                                 | 0.0161                                                                      |
|       | 3           | 350                              | 34 min                     | 5 hrs            | 5 x 5                                                 | 0.0206                                                                      |
| 0.60  | 1           | 350                              | 2.5 hrs                    | 14 hrs           | 5 x 5                                                 | 0.00104                                                                     |
|       | 2           | 350                              | 2.5 hrs                    | 21 hrs           | 5 x 5                                                 | 0.00227                                                                     |
|       | 3           | 350                              | 2.5 hrs                    | 28 hrs           | 5 x 5                                                 | 0.00243                                                                     |
| 0.52  | 1           | 150                              | 5 hrs                      | 7 days           | 5 x 5                                                 | 0.000371                                                                    |
|       | 2           | 150                              | 5 hrs                      | 7 days           | 5 x 5                                                 | 0.000448                                                                    |
|       | 3           | 150                              | 5 hrs                      | 7 days           | 5 x 5                                                 | 0.000322                                                                    |
| 0.38  | 1           | 150                              | 2 days                     | 10 days          | 5 x 5                                                 | 6.72E-6                                                                     |
|       | 2           | 150                              | 2 days                     | 10 days          | 5 x 5                                                 | 1.61E-5                                                                     |
|       | 3           | 150                              | 2 days                     | 10 days          | 5 x 5                                                 | 3.05E-6                                                                     |

<sup>a</sup> Droplets with an  $a_w$  0.88 were prepared gravimetrically, and hence  $\tau_{\text{diff,water}}$  and  $t_{\text{exp}}$  are not applicable (N/A) in this case.

## Figures

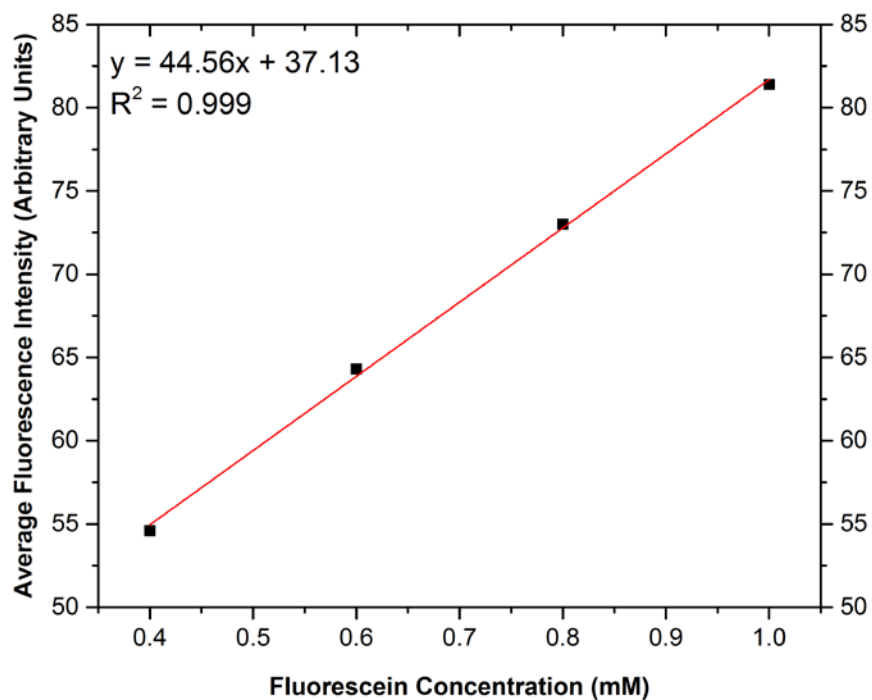

**Figure S1.** Average fluorescence intensity as a function of fluorescein concentration in 50 wt % sucrose solutions. The red line is a result of a linear fit to the data.

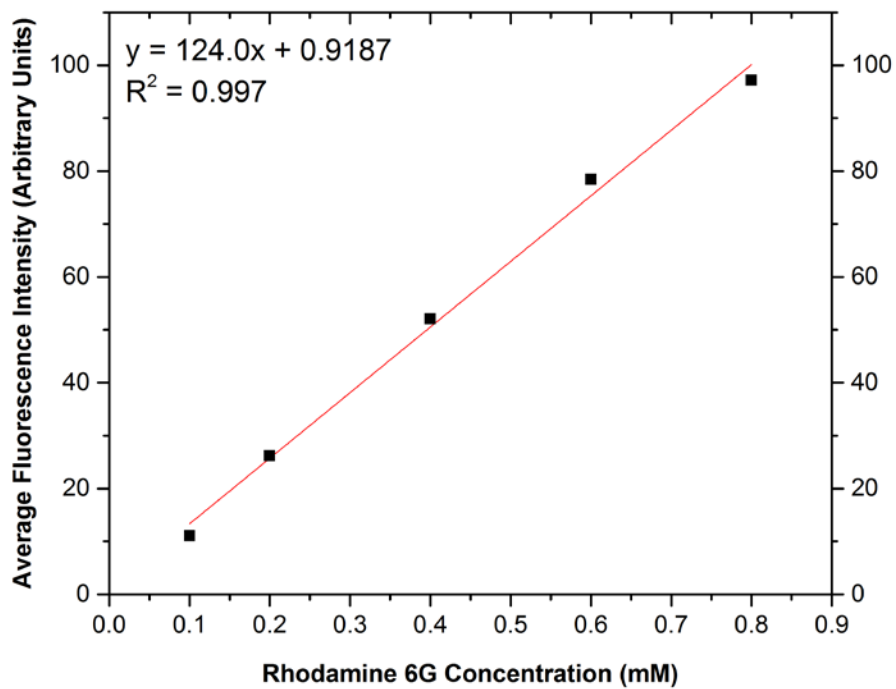

**Figure S2.** Average fluorescence intensity as a function of rhodamine 6G concentration in 50 wt % sucrose solutions. The red line is a result of a linear fit to the data.

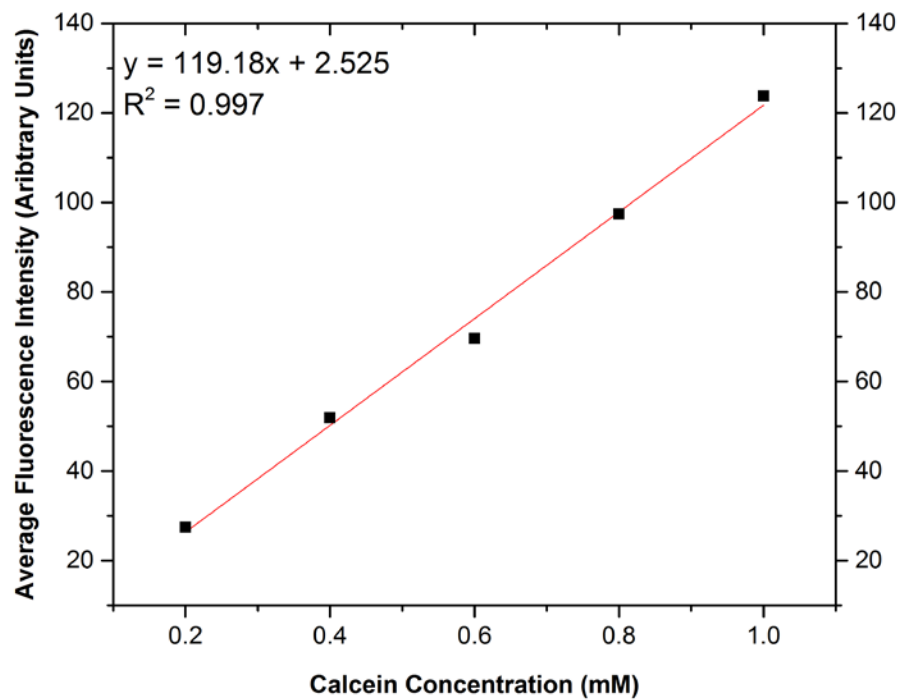

**Figure S3.** Average fluorescence intensity as a function of calcein concentration in 50 wt % sucrose solutions. The red line is a result of a linear fit to the data.

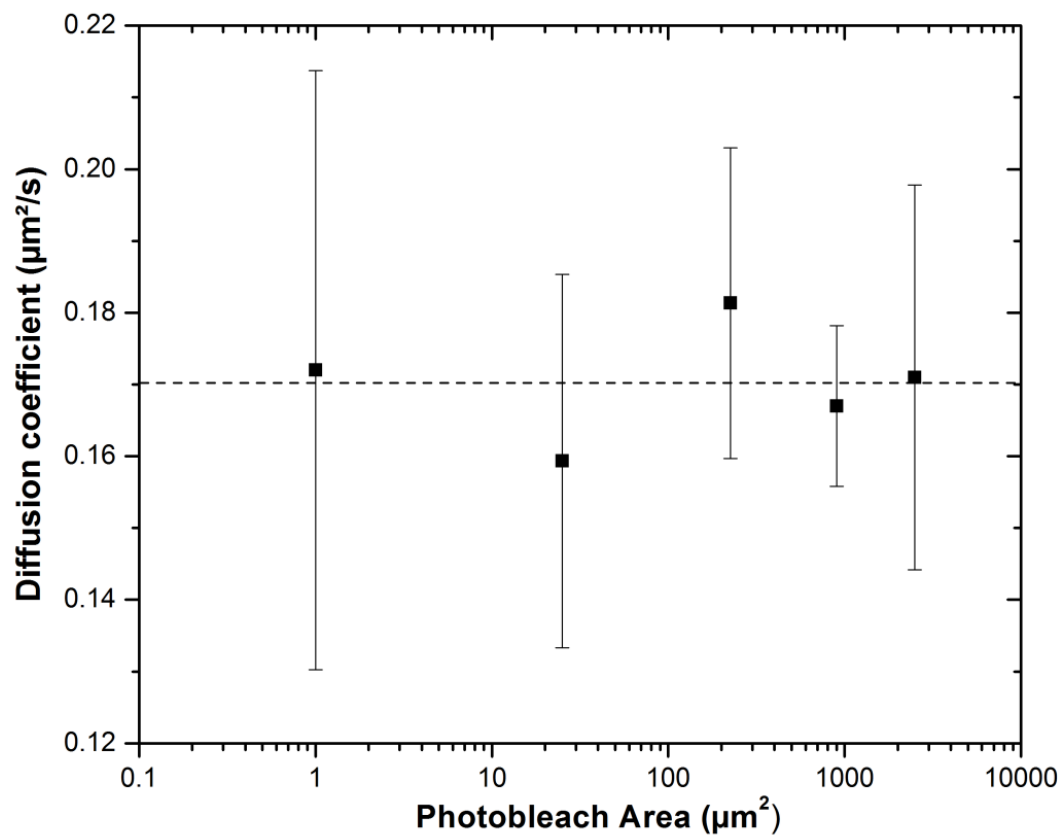

**Figure S4.** Measured diffusion coefficients of calcein in sucrose-water films conditioned at  $a_w$  of 0.80 using bleach sizes of  $1 \times 1 \mu\text{m}$  (photobleach area of  $1 \mu\text{m}^2$ ),  $5 \times 5 \mu\text{m}$  (photobleach area of  $25 \mu\text{m}^2$ ),  $15 \times 15 \mu\text{m}$  (photobleach area of  $225 \mu\text{m}^2$ ),  $30 \times 30 \mu\text{m}$  (photobleach area of  $900 \mu\text{m}^2$ ) and  $50 \times 50 \mu\text{m}$  (photobleach area of  $2500 \mu\text{m}^2$ ). The dashed line represents the average value of the data points (black squares).



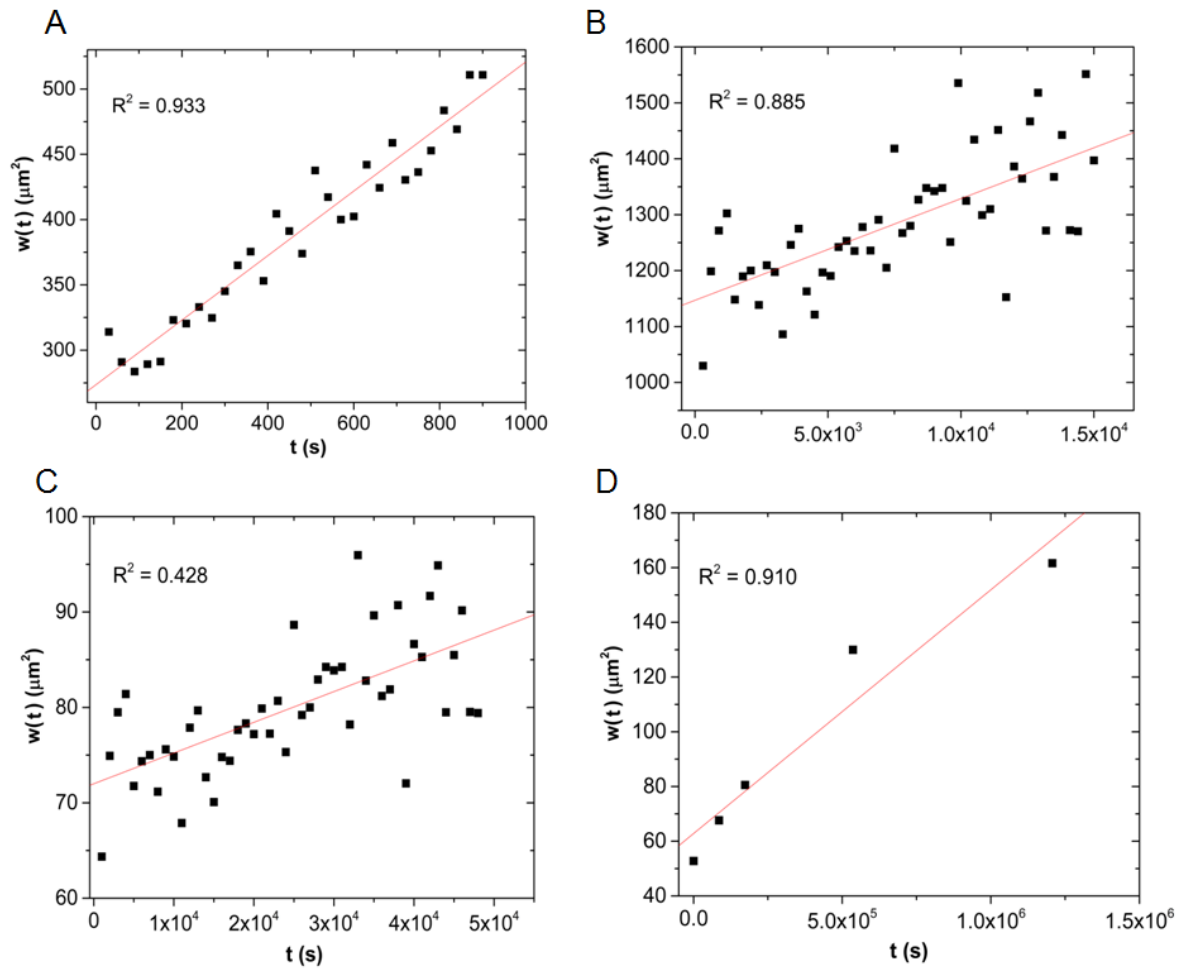

**Figure S5.** Example plots of  $w(t)$  versus time using fluorescein at the following  $a_w$  values: 0.70 (A), 0.60 (B), 0.52 (C) and 0.38 (D). The black squares represent measured data points, and the red line is a linear fit to the data.

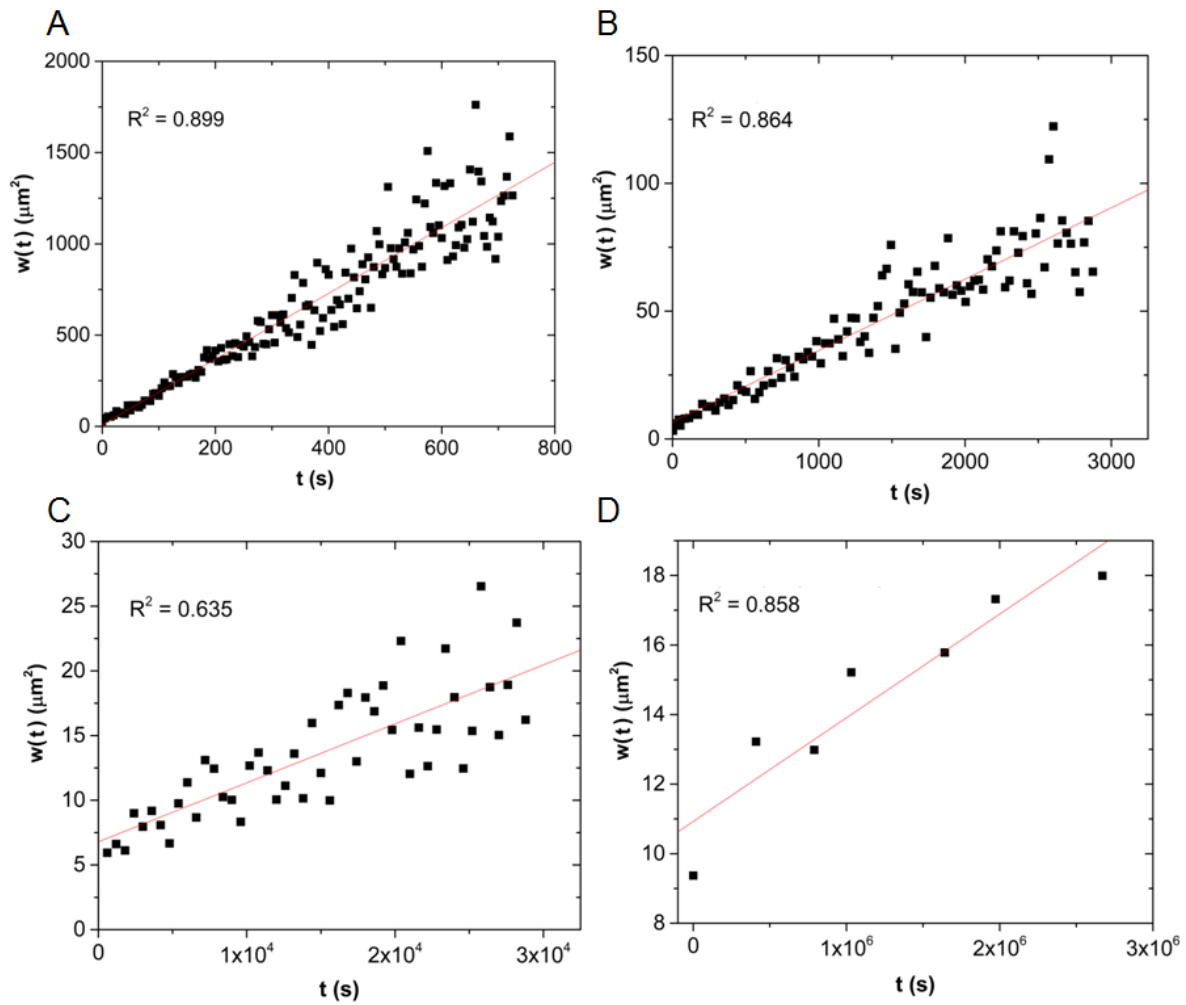

**Figure S6.** Example plots of  $w(t)$  versus time using rhodamine 6G at the following  $a_w$  values: 0.70 (A), 0.60 (B), 0.52 (C) and 0.38 (D). The black squares represent measured data points, and the red line is a linear fit to the data.

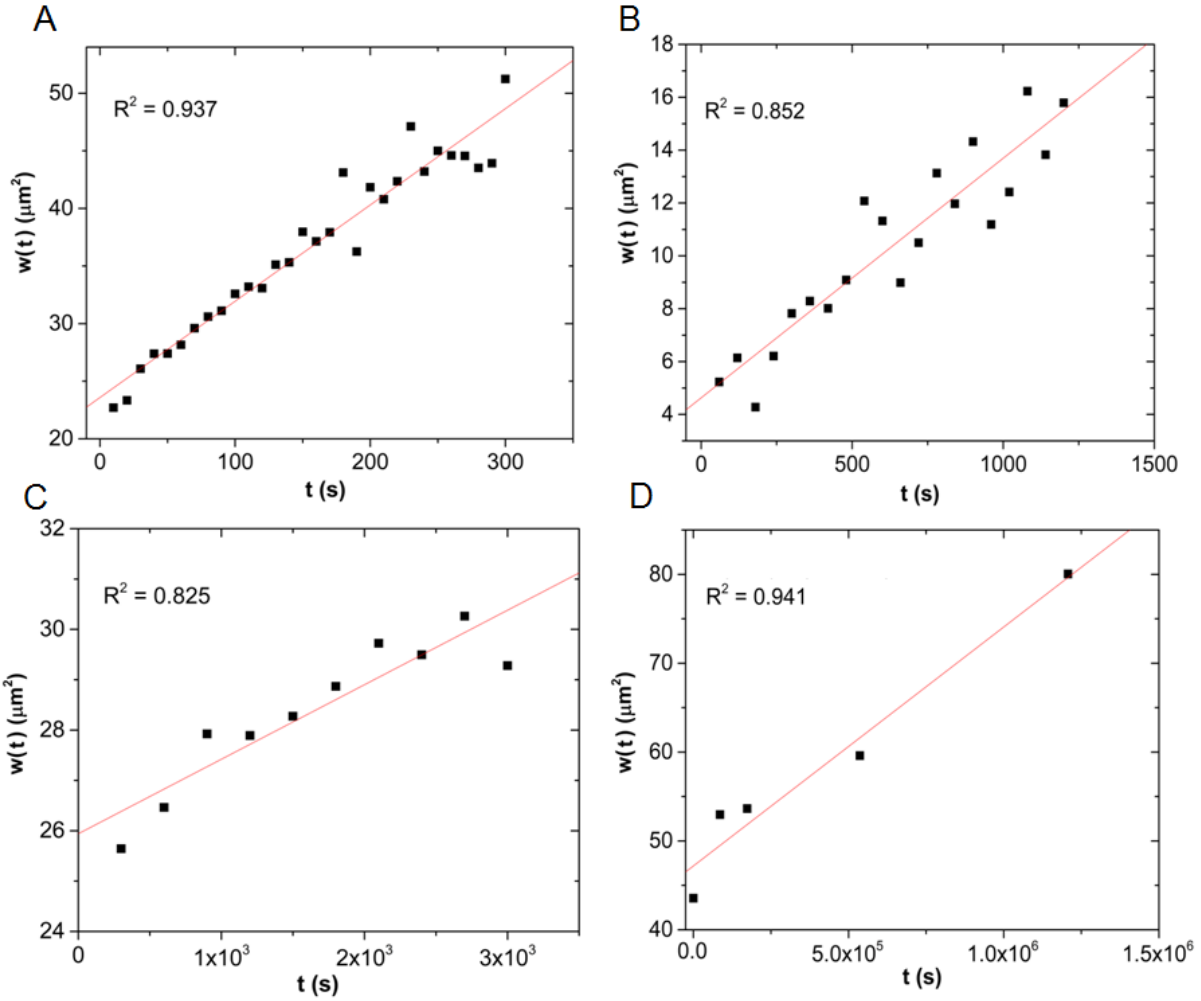

**Figure S7.** Example plots of  $w(t)$  versus time using calcein at the following  $a_w$  values: 0.70 (A), 0.60 (B), 0.52 (C) and 0.38 (D). The black squares represent measured data points, and the red line is a linear fit to the data.
